# Supplementary material for: Molecular phylogeny and timing of diversification in Alpine Rhithrogena (Ephemeroptera: Heptageniidae)
Source: PubMed Central journal article supplement (PMC5031269; doi:10.1186/s12862-016-0758-1), 2016-09-21
Supplement: 12862_2016_758_MOESM1_ESM.pdf [file 12862_2016_758_MOESM1_ESM.pdf]

Table S1. Detailed sampling. For each *Rhithrogena* individual, the voucher name (voucher), the origin (country and region), the coordinates of the sampling points (latitude and longitude in decimal degrees), the species group as defined in Figs. 2, 3 (sp group), the GMYC species identification as labeled in Figs. 2, 3 (sp) and the GMYC species number (nb) from Vuataz et al. [1] are indicated. Individuals are named only when they originated from type localities (i.e., topotypes) or could be unambiguously identified, and are otherwise referred to as “sp”. For the 11 newly collected individuals (bold), the GMYC species numbers are indicated when they obviously clustered with one of the 31 GMYC species from Vuataz et al. [1]. When individuals are from GMYC species linked to more than one name in Vuataz et al. [1], the latest name(s) are mentioned between brackets.

| <b>voucher</b> | <b>country</b> | <b>region</b> | <b>lat</b> | <b>long</b> | <b>sp group</b> | <b>sp</b>                                                                                                                                                                                                | <b>nb</b> |
|----------------|----------------|---------------|------------|-------------|-----------------|----------------------------------------------------------------------------------------------------------------------------------------------------------------------------------------------------------|-----------|
| 033FRDRDI      | France         | Drôme         | 44.746     | 5.503       | hybrida         | <i>Rh. diensis</i> Sowa & Degrange, 1987                                                                                                                                                                 | 20        |
| 037AUTYRO      | Austria        | Tyrol         | 47.247     | 11.472      | semicolorata    | <i>Rh. taurisca</i> Bauernfeind, 1992<br>( <i>Rh. rolandi</i> Weichselbaumer, 1995)                                                                                                                      | 5         |
| 041CHGRGS      | Switzerland    | Graubünden    | 46.674     | 8.761       | hybrida         | <i>Rh. grischuna</i> Sartori & Oswald, 1988                                                                                                                                                              | 15        |
| 042FRHSAB      | France         | Haute-Savoie  | 46.114     | 6.553       | alpestris       | <i>Rh. allobrogica</i> Sowa & Degrange, 1987                                                                                                                                                             | 26        |
| 045PLPPCI      | Poland         | Lesser Poland | 49.266     | 19.870      | hybrida         | <i>Rh. circumtatica</i> Sowa & Soldán, 1986                                                                                                                                                              | 18        |
| 047FRISMA      | France         | Isère         | 45.154     | 5.606       | hybrida         | <i>Rh. hybrida</i> Eaton, 1885<br>( <i>Rh. austriaca</i> Sowa & Weichselbaumer, 1988)<br>( <i>Rh. endenensis</i> Metzler, Tomka & Zurwerra, 1985)<br>( <i>Rh. mariaedomonicae</i> Sowa & Degrange, 1987) | 19        |
| 052ITVANI      | Italy          | Aosta Valley  | 45.785     | 6.900       | hybrida         | <i>Rh. nivata</i> (Eaton, 1871)                                                                                                                                                                          | 13        |
| 078FRHSLA      | France         | Haute-Savoie  | 46.098     | 6.592       | alpestris       | <i>Rh. landai</i> Sowa & Soldán, 1984<br>( <i>Rh. vaillantii</i> Sowa & Degrange, 1987)                                                                                                                  | 27        |
| 088CZBOBE      | Czech Republic | South Bohemia | 48.671     | 14.615      | diaphana        | <i>Rh. beskidensis</i> Alba-Tercedor & Sowa, 1987                                                                                                                                                        | 29        |
| 094PLPPIR      | Poland         | Lesser Poland | 49.251     | 19.815      | semicolorata    | <i>Rh. iridina</i> (Kolenati, 1839)                                                                                                                                                                      | 6         |
| 110FRSAGT      | France         | Savoie        | 45.688     | 6.117       | hybrida         | <i>Rh. gratianopolitana</i> Sowa, Degrange & Sartori, 1986                                                                                                                                               | 16        |
| 111FRSAGT      | France         | Savoie        | 45.688     | 6.117       | hybrida         | <i>Rh. gratianopolitana</i>                                                                                                                                                                              | 17        |
| 113FRSADO      | France         | Savoie        | 45.639     | 6.192       | semicolorata    | <i>Rh. dorieri</i> Sowa, 1971<br>( <i>Rh. colmarsensis</i> Sowa, 1984)                                                                                                                                   | 1         |
| 117FRPYLO      | France         | Pyrenees      | 42.780     | 1.132       | loyolaea        | sp 9                                                                                                                                                                                                     | 25        |

|                  |                       |                         |               |               |                     |                                                                                        |           |
|------------------|-----------------------|-------------------------|---------------|---------------|---------------------|----------------------------------------------------------------------------------------|-----------|
| 118CZPAPT        | Czech Republic        | Pardubice               | 50.093        | 16.815        | semicolorata        | <i>Rh. puytoraci</i> Sowa & Degrange, 1987                                             | 11        |
| 163FRARTA        | France                | Ardèche                 | 44.837        | 4.646         | semicolorata        | sp 4                                                                                   | 9         |
| 173CHFRSC        | Switzerland           | Fribourg                | 46.520        | 6.969         | semicolorata        | sp 5                                                                                   | 12        |
| 204FRPYSP        | France                | Pyrenees                | 42.780        | 1.132         | semicolorata        | sp 2                                                                                   | 4         |
| 266FRAHDI        | France                | Alpes de Haute-Provence | 44.330        | 6.587         | hybrida             | sp 6                                                                                   | 21        |
| 303FRDRFO        | France                | Drôme                   | 44.746        | 5.503         | semicolorata        | <i>Rh. fonticola</i> Sowa & Degrange, 1987                                             | 8         |
| 317CHVSAP        | Switzerland           | Valais                  | 46.175        | 7.576         | alpestris           | <i>Rh. alpestris</i> Eaton, 1885                                                       | 28        |
| 373FRHSSA        | France                | Haute-Savoie            | 45.892        | 6.254         | diaphana            | <i>Rh. savoienis</i> Alba-Tercedor & Sowa, 1987                                        | 31        |
| 400ITVESP        | Italy                 | Veneto                  | 46.624        | 12.469        | semicolorata        | sp 3                                                                                   | 7         |
| 450AUVOGE        | Austria               | Voralberg               | 47.493        | 9.709         | semicolorata        | <i>Rh. germanica</i> Eaton, 1885                                                       | 2         |
| 461CHVSLO        | Switzerland           | Valais                  | 46.214        | 7.968         | loyolaea            | sp 8                                                                                   | 24        |
| 494CZKRCR        | Czech Republic        | Hradec Králové          | 50.679        | 15.833        | hybrida             | <i>Rh. corcontica</i> Sowa & Soldán, 1986                                              | 22        |
| 555CHGEPI        | Switzerland           | Genève                  | 46.346        | 6.152         | semicolorata        | <i>Rh. picteti</i> Sowa, 1971                                                          | 10        |
| <b>576CHBEBE</b> | <b>Switzerland</b>    | <b>Bern</b>             | <b>47.049</b> | <b>7.634</b>  | <b>diaphana</b>     | <b>sp 10</b>                                                                           | <b>30</b> |
| <b>581FRCOIN</b> | <b>France</b>         | <b>Corsica</b>          | <b>42.275</b> | <b>8.890</b>  | <b>hybrida</b>      | <b><i>Rh. insularis</i> Esben-Petersen, 1913</b>                                       |           |
| <b>583FRCOEA</b> | <b>France</b>         | <b>Corsica</b>          | <b>42.297</b> | <b>8.699</b>  | <b>alpestris</b>    | <b><i>Rh. eatoni</i> Esben-Petersen, 1912</b>                                          |           |
| <b>615ITSRNU</b> | <b>Italy</b>          | <b>Sardinia</b>         | <b>39.987</b> | <b>9.187</b>  | <b>hybrida</b>      | <b><i>Rh. nuragica</i> Belfiore, 1987</b>                                              |           |
| <b>625ITTODE</b> | <b>Italy</b>          | <b>Tuscany</b>          | <b>44.130</b> | <b>10.715</b> | <b>hybrida</b>      | <b>sp 11</b>                                                                           |           |
| <b>655SKPRTT</b> | <b>Slovakia</b>       | <b>Prešov</b>           | <b>49.265</b> | <b>20.141</b> | <b>loyolaea</b>     | <b>sp 7</b>                                                                            | <b>23</b> |
| <b>656TUJETU</b> | <b>Tunisia</b>        | <b>Jendouba</b>         | <b>36.802</b> | <b>8.657</b>  | <b>sowai</b>        | <b><i>Rh. sartorii</i> Zrelli &amp; Boumaiza, 2011</b>                                 |           |
| <b>662MTZASP</b> | <b>Montenegro</b>     | <b>Žabljak</b>          | <b>43.152</b> | <b>19.090</b> | <b>semicolorata</b> | <b>sp 12</b>                                                                           |           |
| <b>668ROCLSP</b> | <b>Romania</b>        | <b>Cluj</b>             | <b>46.796</b> | <b>22.731</b> | <b>semicolorata</b> | <b>sp 13</b>                                                                           |           |
| <b>688UKPGSE</b> | <b>United Kingdom</b> | <b>Wales</b>            | <b>51.899</b> | <b>-3.114</b> | <b>semicolorata</b> | <b><i>Rh. semicolorata</i> (Curtis, 1834);<br/>sp 1 in Vuataz <i>et al.</i> (2011)</b> | <b>3</b>  |
| <b>780FRISDE</b> | <b>France</b>         | <b>Isère</b>            | <b>45.209</b> | <b>6.058</b>  | <b>hybrida</b>      | <b><i>Rh. degrangei</i> Sowa, 1969</b>                                                 | <b>14</b> |

Table S2. Genbank/ENA accession numbers of the five gene fragments. “HM” and “JF” codes are from Vuataz et al. [1], “LN” and “KT” codes are from the present study. The voucher name (voucher) and the species identification as labeled in Figs. 2, 3 (sp) are also provided.

| <b>voucher</b> | <b>sp</b>                                                 | <b>cox1</b> | <b>16S</b> | <b>PEPCK</b> | <b>EF-1<math>\alpha</math></b> | <b>wg</b> |
|----------------|-----------------------------------------------------------|-------------|------------|--------------|--------------------------------|-----------|
| 033FRDRDI      | <i>diensis</i>                                            | HM480867    | LN868637   | HM582956     | LN868559                       | LN868598  |
| 037AUTYRO      | <i>taurisca (+ rolandi)</i>                               | HM480871    | LN868638   | HM582960     | LN868560                       | LN868599  |
| 041CHGRGS      | <i>grischuna</i>                                          | HM480875    | LN868639   | KT159745     | LN868561                       | LN868600  |
| 042FRHSAB      | <i>allobrogica</i>                                        | HM480876    | LN868640   | HM582964     | LN868562                       | LN868601  |
| 045PLPPCI      | <i>circumtatrica</i>                                      | HM480877    | LN868641   | KT159746     | LN868563                       | LN868602  |
| 047FRISMA      | <i>hybrida (+ austriaca, endenensis, mariaedominicae)</i> | HM480878    | LN868642   | KT159747     | LN868564                       | LN868603  |
| 052ITVANI      | <i>nivata</i>                                             | LN868541    | LN868643   | KT159748     | LN868565                       | LN868604  |
| 078FRHSLA      | <i>landai (+ vaillanti)</i>                               | HM480898    | LN868644   | HM582987     | LN868566                       | LN868605  |
| 088CZBOBE      | <i>beskidensis</i>                                        | LN868542    | LN868645   | HM582994     | LN868567                       | LN868606  |
| 094PLPIIR      | <i>iridina</i>                                            | HM480909    | LN868646   | HM582999     | LN868568                       | LN868607  |
| 110FRSAGT      | <i>gratianopolitana</i>                                   | HM480921    | LN868647   | KT159749     | LN868569                       | LN868608  |
| 111FRSAGT      | <i>gratianopolitana</i>                                   | HM480922    | LN868648   | KT159750     | LN868570                       | LN868609  |
| 113FRSADO      | <i>dorieri (+ colmarsensis)</i>                           | HM480924    | LN868649   | HM583011     | LN868571                       | LN868610  |
| 117FRPYLO      | sp 9                                                      | HM480928    | LN868650   | HM583014     | LN868572                       | LN868611  |
| 118CZPAPT      | <i>puytoraci</i>                                          | HM480929    | LN868651   | HM583015     | LN868573                       | LN868612  |
| 163FRARTA      | sp 4                                                      | HM480960    | LN868652   | HM583045     | LN868574                       | LN868613  |
| 173CHFRSC      | sp 5                                                      | HM480967    | LN868653   | KT159751     | LN868575                       | LN868614  |
| 204FRPYSP      | sp 2                                                      | HM480986    | LN868654   | HM583078     | LN868576                       | LN868615  |
| 266FRAHDI      | sp 6                                                      | HM481018    | LN868655   | HM583126     | LN868577                       | LN868616  |
| 303FRDRFO      | <i>fonticola</i>                                          | HM481037    | LN868656   | HM583150     | LN868578                       | LN868617  |
| 317CHVSAP      | <i>alpestris</i>                                          | LN868543    | LN868657   | KT159752     | LN868579                       | LN868618  |
| 373FRHSSA      | <i>savoienensis</i>                                       | LN868544    | LN868658   | HM583189     | LN868580                       | LN868619  |
| 400ITVESP      | sp 3                                                      | HM481077    | LN868659   | KT159753     | LN868581                       | LN868620  |
| 450AUVOGE      | <i>germanica</i>                                          | LN868545    | LN868660   | HM583241     | LN868582                       | LN868621  |
| 461CHVSLO      | sp 8                                                      | LN868546    | LN868661   | KT159754     | LN868583                       | LN868622  |
| 494CZKRCR      | <i>corcontica</i>                                         | HM481129    | LN868662   | HM583279     | LN868584                       | LN868623  |

|                 |                      |          |          |          |          |          |
|-----------------|----------------------|----------|----------|----------|----------|----------|
| 555CHGEPI       | <i>picteti</i>       | LN868547 | LN868663 | HM583329 | LN868585 | LN868624 |
| 576CHBEBE       | sp 10                | LN868548 | LN868664 | KT159756 | LN868586 | LN868625 |
| 581FRCOIN       | <i>insularis</i>     | LN868549 | LN868665 | KT159757 | LN868587 | LN868626 |
| 583FRCOEA       | <i>eatoni</i>        | LN868550 | LN868666 | KT159758 | LN868588 | LN868627 |
| 615ITSRNU       | <i>nuragica</i>      | LN868551 | LN868667 | KT159759 | LN868589 | LN868628 |
| 625ITTODE       | sp 11                | LN868552 | LN868668 | KT159760 | LN868590 | LN868629 |
| 655SKPRTT       | sp 7                 | LN868553 | LN868669 | KT159761 | LN868591 | LN868630 |
| 656TUJETU       | <i>sartorii</i>      | LN868554 | LN868670 | KT159762 | LN868592 | LN868631 |
| 662MTZASP       | sp 12                | LN868555 | LN868671 | KT159763 | LN868593 | LN868632 |
| 668ROCLSP       | sp 13                | LN868556 | LN868672 | KT159764 | LN868594 | LN868633 |
| 688UKPGSE       | <i>semicolorata</i>  | LN868557 | LN868673 | KT159765 | LN868595 | LN868634 |
| 780FRISDE       | <i>degrangei</i>     | LN868558 | LN868674 | KT159755 | LN868596 | LN868635 |
| m185 (outgroup) | <i>Cinygmula</i> sp. | JF423908 | LN868675 | JF423909 | LN868597 | LN868636 |

Table S3. Mean (mean), minimum (low) and maximum (high) altitude records for each GMYC species (sp) of the hybrida and alpestris species groups (sp group) used in the ancestral state reconstructions. The number of sampling sites (n) is also provided for each GMYC species. All altitude records are from the authors' personal database (unpublished).

| <b>sp</b>               | <b>sp group</b> | <b>mean</b> | <b>low</b> | <b>high</b> | <b>n</b> |
|-------------------------|-----------------|-------------|------------|-------------|----------|
| <i>grischuna</i>        | hybrida         | 1509        | 1154       | 1773        | 10       |
| <i>nivata</i>           | hybrida         | 1780        | 1581       | 2170        | 6        |
| <i>insularis</i>        | hybrida         | 816         | 625        | 1100        | 4        |
| <i>nuragica</i>         | hybrida         | 560         | 560        | 560         | 1        |
| <i>degrangei</i>        | hybrida         | 1224        | 231        | 2184        | 22       |
| <i>corcontica</i>       | hybrida         | 1147        | 460        | 1510        | 17       |
| <i>gratianopolitana</i> | hybrida         | 718         | 400        | 1230        | 17       |
| <i>gratianopolitana</i> | hybrida         | 893         | 631        | 1180        | 3        |
| <i>circumtatrica</i>    | hybrida         | 1030        | 950        | 1158        | 3        |
| <i>hybrida</i>          | hybrida         | 972         | 355        | 1850        | 46       |
| sp 11                   | hybrida         | 850         | 850        | 850         | 1        |
| <i>diensis</i>          | hybrida         | 814         | 759        | 868         | 2        |
| sp 6                    | hybrida         | 1685        | 1657       | 1713        | 2        |
| <i>alpestris</i>        | alpestris       | 1246        | 725        | 1608        | 12       |
| <i>landai</i>           | alpestris       | 555         | 12         | 1171        | 23       |
| <i>eatoni</i>           | alpestris       | 333         | 40         | 625         | 2        |
| <i>allobrogica</i>      | alpestris       | 473         | 12         | 653         | 11       |

Table S4. Results of birth-death likelihood (BDL) analysis of the model-completed *Rhithrogena* data set (74 taxa), based on 1000 completed phylogenies generated with CorSiM [2, 3].  $r$  = diversification rate (species per My),  $r1$  = diversification rate before st;  $r2$  = diversification rate after st; st = time of rate shift (in Mya);  $a$  = extinction fraction;  $x$  = rate change parameter;  $k$  = carrying capacity. The preferred model (Yule-2-rates) is indicated in bold.

| Models     | Yule    | Yule-2-rates   |             |             | Birth-death | DDL     |      | DDX     |      |           |
|------------|---------|----------------|-------------|-------------|-------------|---------|------|---------|------|-----------|
| Mean AIC   | -112.18 | <b>-113.21</b> |             |             | -111.84     | -111.46 |      | -110.16 |      |           |
| SD         | 6.73    | <b>7.92</b>    |             |             | 7.78        | 7.57    |      | 6.69    |      |           |
| %          | 33.00   | <b>62.00</b>   |             |             | 6.00        | 0.00    |      | 0.00    |      |           |
| Parameters | $r$     | $r1$           | $r2$        | st          | $r$         | $a$     | $r$  | $x$     | $r$  | $k$       |
| Mean       | 0.20    | <b>0.21</b>    | <b>0.19</b> | <b>0.22</b> | 0.16        | 0.37    | 0.13 | -0.15   | 0.21 | 1192795   |
| SD         | 0.01    | <b>0.01</b>    | <b>0.22</b> | <b>0.13</b> | 0.02        | 0.15    | 0.02 | 0.07    | 0.01 | 358701.07 |

## References

1. Vuataz L, Sartori M, Wagner A, Monaghan MT. Toward a DNA taxonomy of Alpine Rhithrogena (Ephemeroptera: Heptageniidae) using a mixed Yule-coalescent analysis of mitochondrial and nuclear DNA. PLoS One. 2011;6(5):e19728.
2. Stadler T. Simulating trees with a fixed number of extant species. Syst Biol. 2011;60(5):676–84.
3. Cusimano N, Stadler T, Renner SS. A new method for handling missing species in diversification analysis applicable to randomly or nonrandomly sampled phylogenies. Syst Biol. 2012;61(5):785–92.
